# Supplementary material for: IL-18BP mediates the balance between protective and pathological immune responses to Toxoplasma gondii
Source: PubMed Central journal article supplement — Cell Rep. Author manuscript; Available in PMC 2023 Apr 26. (PMC10131179; doi:10.1016/j.celrep.2023.112147), 2023-02-23
Supplement: NIHMS1887264-supplement-1.pdf [file NIHMS1887264-supplement-1.pdf]

Cell Reports, Volume 42

**Supplemental information**

**IL-18BP mediates the balance between protective  
and pathological immune responses  
to *Toxoplasma gondii***

**Joseph T. Clark, Orr-El Weizman, Daniel L. Aldridge, Lindsey A. Shallberg, Julia Eberhard, Zachary Lanzar, Devon Wasche, John D. Huck, Ting Zhou, Aaron M. Ring, and Christopher A. Hunter**

### Figure S1: D2D treatment reduces parasite burden in WT mice

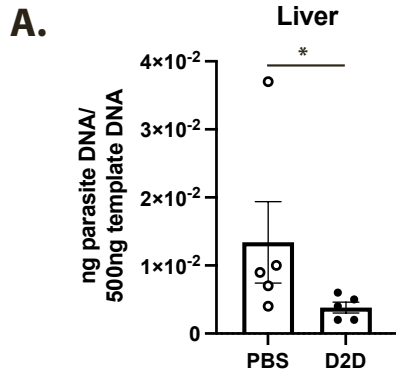

### Figure S1:D2D Treatment reduces parasite burden in WT mice

(A) WT B6 were infected with *T. gondii* and treated with either PBS or D2D at 7 and 9 DPI. Mice were sacrificed at 10 dpi and parasite burdens in the liver were measured by qPCR. \*p<0.05, (Mann-Whitney test).

## Figure S2: Validation of CD8<sup>+</sup> T cell depletion

A.

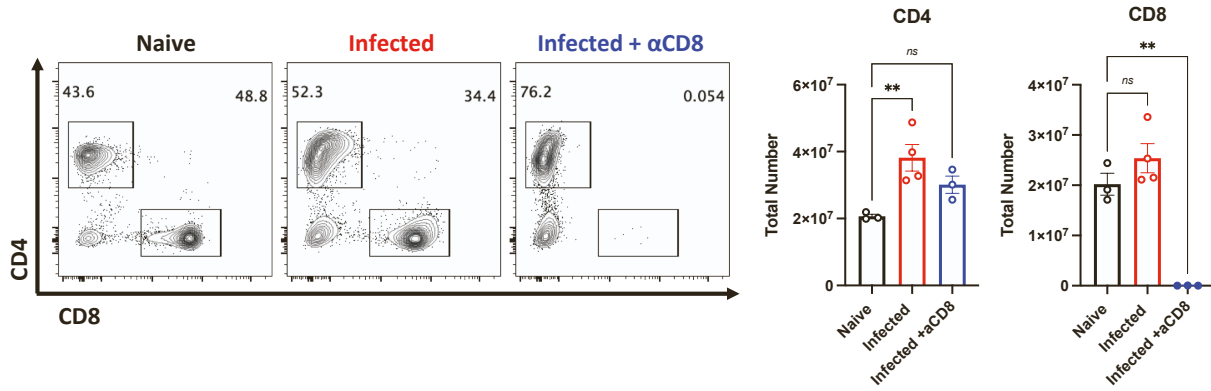

## Figure S2: Validation of CD8<sup>+</sup> T cell depletion

(A) B6 mice were infected with *T. gondii*. At D7, 0.5mg of anti-CD8 antibody clone 2.43 was administered via IP injection. Mice were sacrificed at 10 dpi and splenocytes were analyzed via flow cytometry. NS, not significant. \*\*p < 0.0021 (ordinary one-way ANOVA).
